# Supplementary material
Source: PubMed Central journal article supplement (PMC6776982)
Supplement: ao9b01996_si_001.pdf [file ao9b01996_si_001.pdf]

## Supporting Information

# Surfactant sensitized covalent organic frameworks functionalized lanthanide doped nanocrystals : An ultrasensitive sensing platform for perfluorooctane sulfonate

Jing Li <sup>a</sup>, Caiyun Zhang<sup>a</sup>, Mingyuan Yin<sup>a</sup>, Zhen Zhang<sup>a</sup>, Yujie Chen<sup>a</sup>,  
Qiliang Deng<sup>a,\*</sup> and Shuo Wang<sup>a,b,\*</sup>

<sup>a</sup> Key Laboratory of Food Nutrition and Safety, Ministry of Education,  
Tianjin Key Laboratory of Food Nutrition and Safety, College of  
Chemical Engineering and Materials Science, Tianjin University of  
Science and Technology, Tianjin, 300457, China.

<sup>b</sup> Tianjin Key Laboratory of Food Science and Health, School of  
Medicine, Nankai University, Tianjin, 300071, China.

Corresponding Authors

\*Qiliang Deng E-mail: yhdql@tust.edu.cn;

\*Shuo Wang E-mail: s.wang@tust.edu.cn



## 1. SEM characterization of UCNPs@COFs

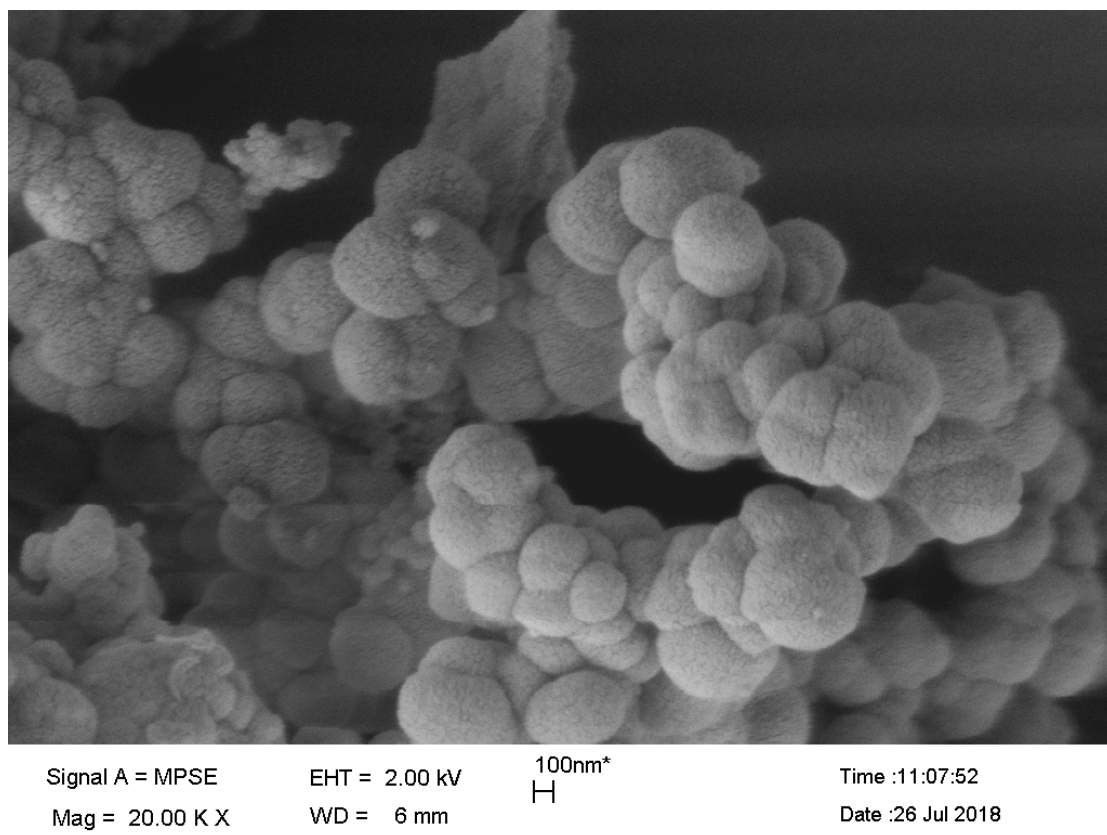

**Figure S1.** SEM images of UCNPs@COFs.

## 2. FT-IR characterization of TFB, PDA and UCNPs@COFs

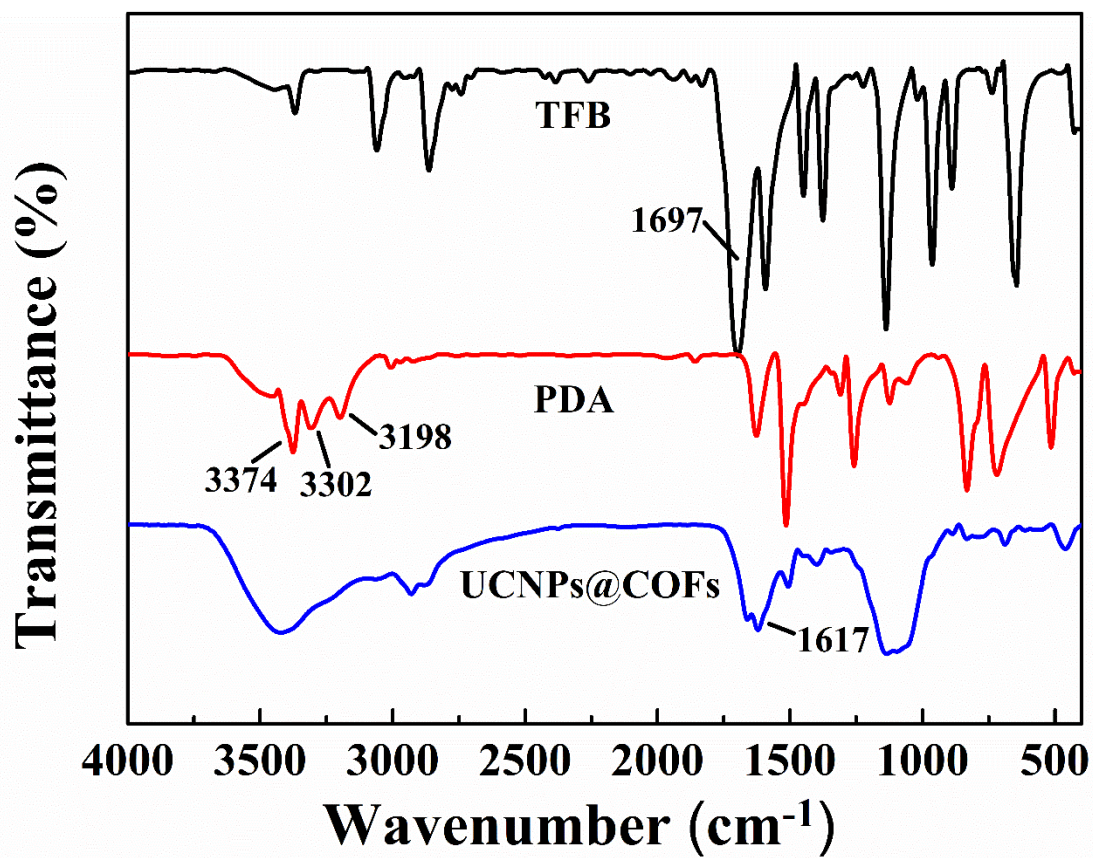

**Figure S2.** FT-IR spectra of TFB (black), PDA (red) and UCNPs@COFs (blue).



### 3. Solvent selection of the detection system

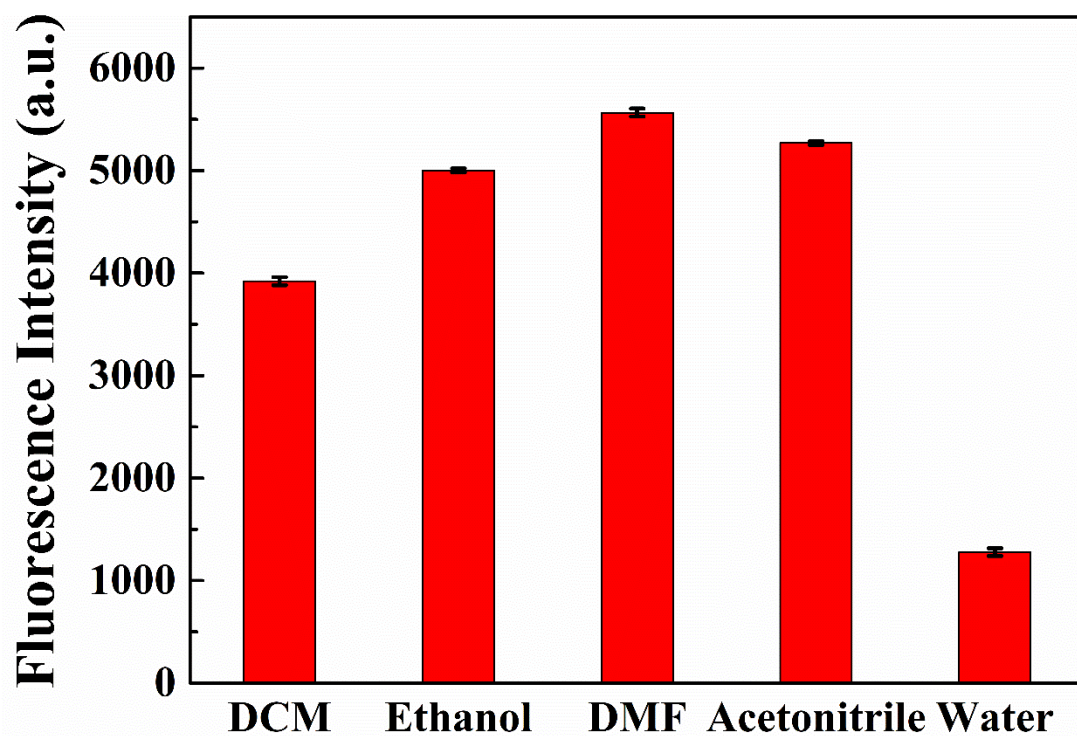

**Figure S3.** Fluorescence intensities of UCNPs@COFs dispersed in four organic solvents and water.

#### 4. Stability of UCNPs@COFs

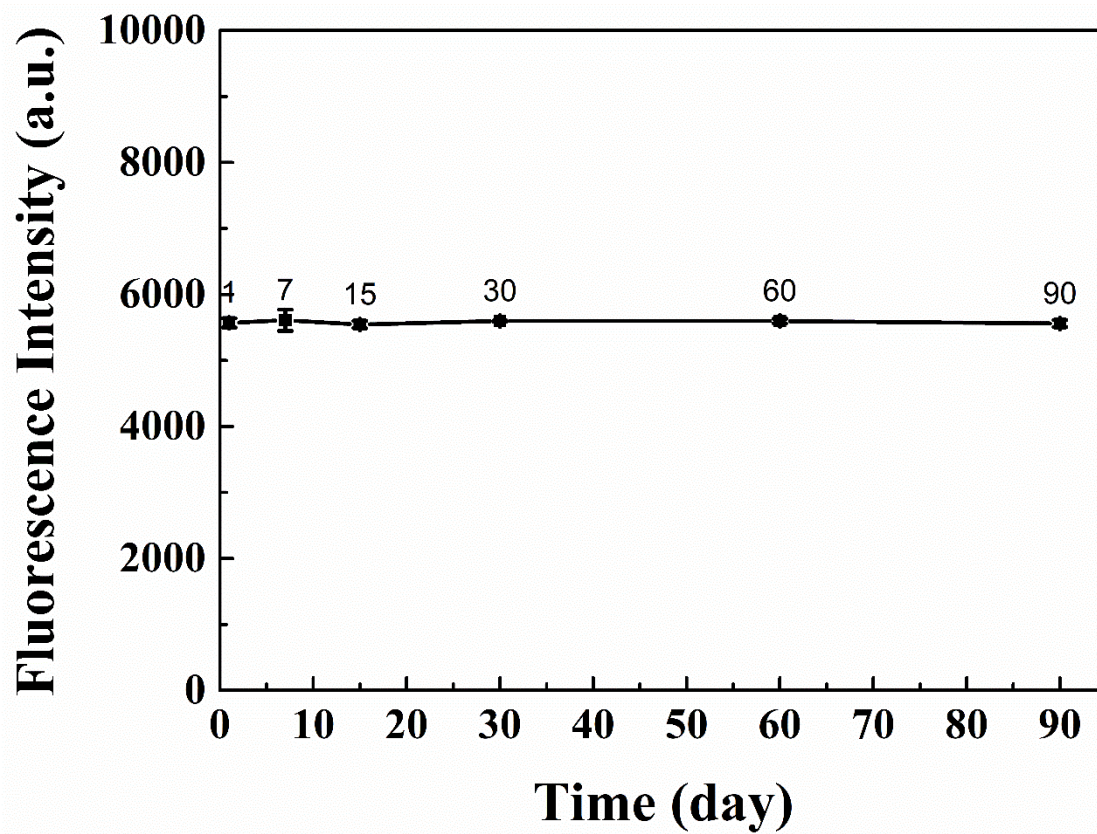

**Figure S4.** Fluorescence intensities of UCNPs@COFs (dispersed in DMF) during storing.





## 5. Effect of different surfactants on UCNPs@COFs

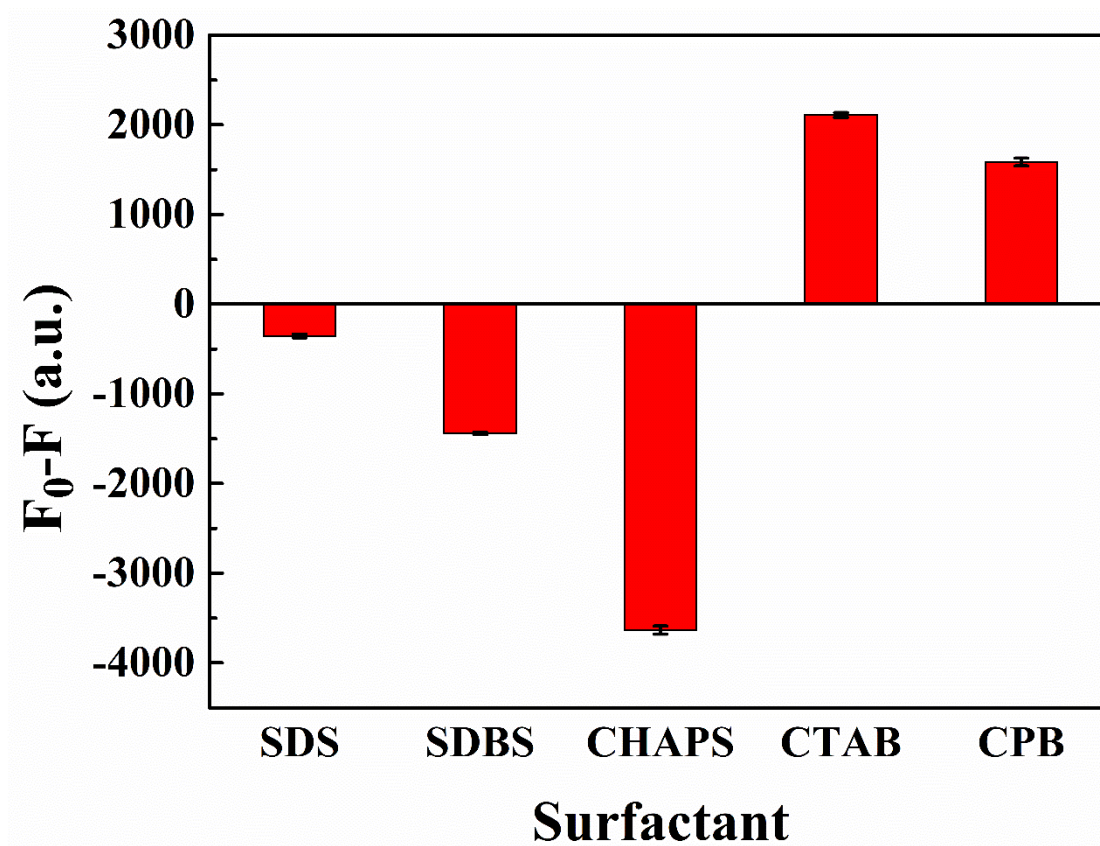

**Figure S5.** The effect of different surfactants on UCNPs@COFs. ( $F_0$  and  $F$  are the fluorescence intensities of UCNPs@COFs at 550 nm in the absence and presence of surfactant, respectively)



## 6. Contact angles testing

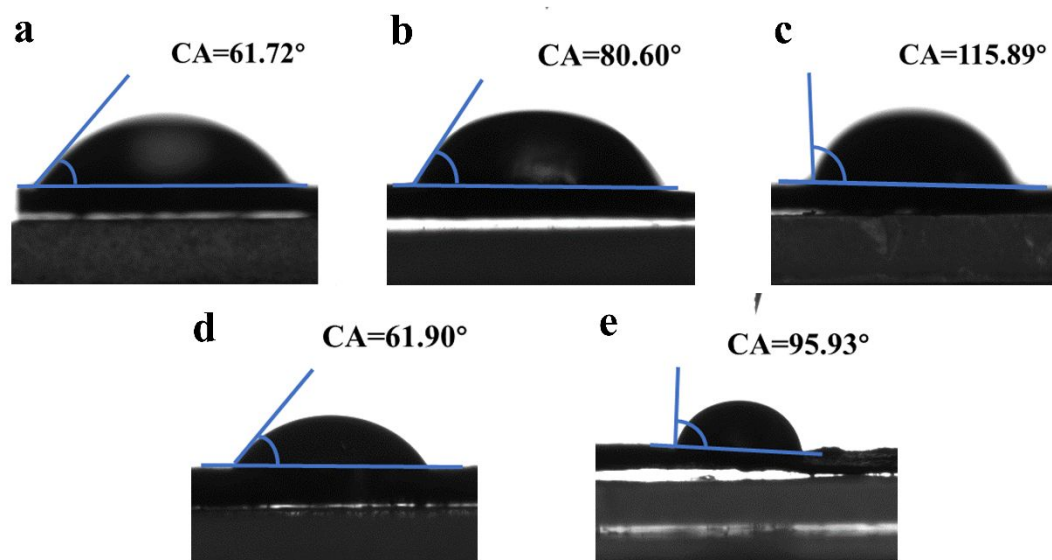

**Figure S6.** Contact angles of UCNPs@NH<sub>2</sub> (a), UCNPs@COFs (b), UCNPs@COFs & SDBS (c), UCNPs@COFs & CHAPS (d), UCNPs@COFs & CPB (e).



## 7. Stern-Volmer plots of $F_0/F$ vs $\lg[\text{PFOS}]$

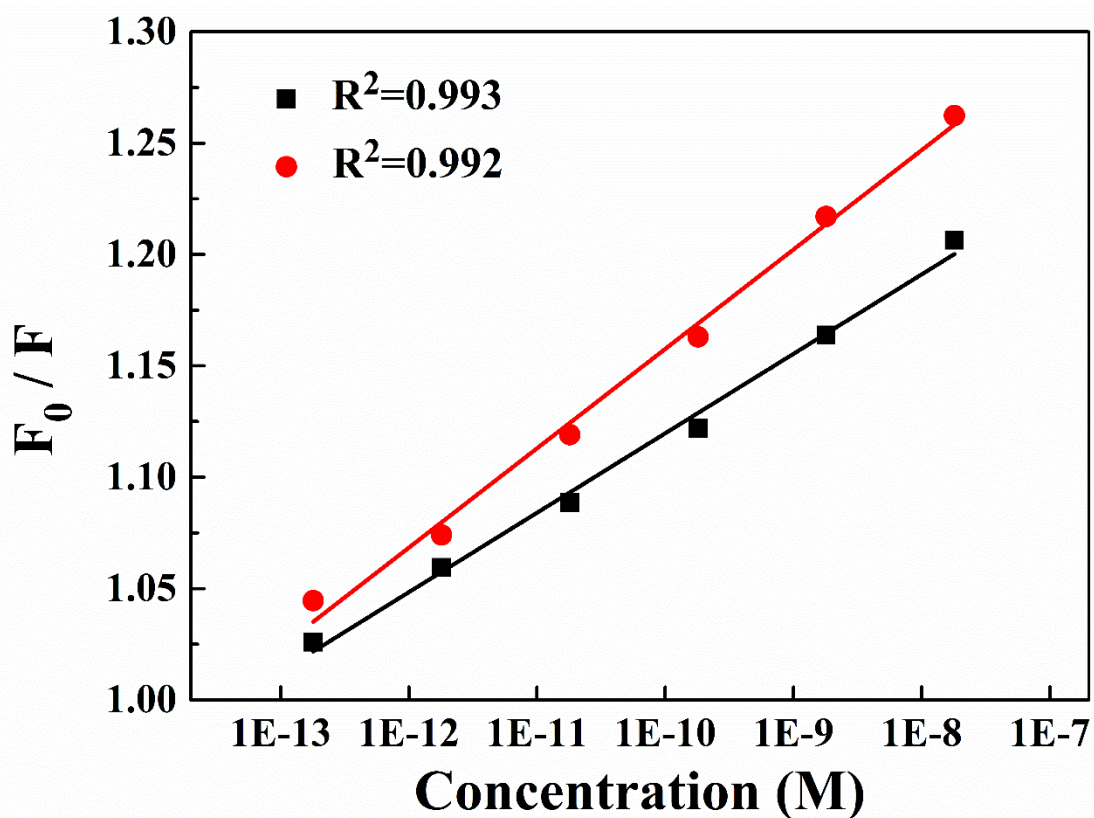

**Figure S7.** Stern-Volmer plots of  $F_0/F$  vs  $\lg[\text{PFOS}]$ . (The fluorescence quenching of UCNPs@COFs to different amounts of PFOS were determined at room temperature (black line) and at  $50\text{ }^\circ\text{C}$  (red line), respectively.)



## 8. Method validation results

**Table S1.** Recoveries of PFOS spiked tap water samples and food packing samples using LC-MS/MS.

| Sample       | PFOS added (M)         | PFOS found (M)         | Recovery (%) |
|--------------|------------------------|------------------------|--------------|
| Tap water    | $1.80 \times 10^{-10}$ | $2.10 \times 10^{-10}$ | 116          |
| Water bottle | $1.80 \times 10^{-10}$ | $2.40 \times 10^{-10}$ | 133          |

## 9. Structures of six structural analogues of PFOS

**Table S2.** The structures of six structural analogues of PFOS.

| Compound | Structure | MW (g/mol) |
|----------|-----------|------------|
| PFOS     |           | 538.15     |
| PFDA     |           | 514.09     |
| PFNA     |           | 464.08     |
| PFOA     |           | 414.20     |
| PFHpA    |           | 364.06     |
| PFHxA    |           | 314.05     |
| PFHxS    |           | 438.00     |
